# Supplementary material
Source: HighWire-hosted journal article supplement (https://www.cmajopen.ca/highwire/filestream/88297/field_highwire_adjunct_files/2/open-2022-0019-reporting-guideline-checklist.pdf)
Supplement: open-2022-0019-reporting-guideline-checklist.pdf [file open-2022-0019-reporting-guideline-checklist.pdf]

## Consolidated Criteria for Reporting Qualitative Research Checklist

| No. Item                                       | Guide Questions or Description                                                                          | Reported on Page # |
|------------------------------------------------|---------------------------------------------------------------------------------------------------------|--------------------|
| <b>DOMAIN 1: RESEARCH TEAM AND REFLEXIVITY</b> |                                                                                                         |                    |
| <i>Personal Characteristics</i>                |                                                                                                         |                    |
| 1. Interviewer/facilitator                     | Which author/s conducted the interview or focus group?                                                  | Results            |
| 2. Credentials                                 | What were the researcher's credentials?                                                                 | Methods            |
| 3. Occupation                                  | What was their occupation at the time of the study?                                                     | Methods            |
| 4. Gender                                      | Was the researcher male or female?                                                                      | Methods            |
| 5. Experience and training                     | What experience or training did the researcher have?                                                    | Methods            |
| <i>Relationship with participants</i>          |                                                                                                         |                    |
| 6. Relationship established                    | Was a relationship established prior to study commencement?                                             | Methods            |
| 7. Participant knowledge of the interviewer    | What did the participants know about the researcher?                                                    | Methods            |
| 8. Interviewer characteristics                 | What characteristics were reported about the interviewer/facilitator?                                   | Methods            |
| <b>DOMAIN 2: STUDY DESIGN</b>                  |                                                                                                         |                    |
| <i>Theoretical framework</i>                   |                                                                                                         |                    |
| 9. Methodological orientation and Theory       | What methodological orientation was stated to underpin the study?                                       | Methods            |
| <i>Participant selection</i>                   |                                                                                                         |                    |
| 10. Sampling                                   | How were participants selected?                                                                         | Methods            |
| 11. Method of approach                         | How were participants approached?                                                                       | Methods            |
| 12. Sample size                                | How many participants were in the study?                                                                | Results            |
| 13. Nonparticipation                           | How many people refused to participate or dropped out? Reasons?                                         | Methods            |
| <i>Setting</i>                                 |                                                                                                         |                    |
| 14. Setting of data collection                 | Where was the data collected?                                                                           | Methods            |
| 15. Presence of non-participants               | Was anyone else present besides the participants and researchers?                                       | Results            |
| 16. Description of sample                      | What are the important characteristics of the sample?                                                   | Results            |
| <i>Data collection</i>                         |                                                                                                         |                    |
| 17. Interview guide                            | Were questions, prompts, guides provided by the authors? Was it pilot tested?                           | Methods            |
| 18. Repeat interviews                          | Were repeat interviews carried out? If yes, how many?                                                   | N/A                |
| 19. Audio/visual recording                     | Did the research use audio or visual recording to collect the data?                                     | Methods            |
| 20. Field notes                                | Were field notes made during and/or after the interview or focus group?                                 | Methods            |
| 21. Duration                                   | What was the duration of the interviews or focus group?                                                 | Methods            |
| 22. Data saturation                            | Was data saturation discussed?                                                                          | Methods            |
| 23. Transcripts returned                       | Were transcripts returned to participants for comment and/or correction?                                | Methods            |
| <b>DOMAIN 3: ANALYSIS AND FINDINGS</b>         |                                                                                                         |                    |
| <i>Data analysis</i>                           |                                                                                                         |                    |
| 24. Number of data coders                      | How many data coders coded the data?                                                                    | Methods            |
| 25. Description of the coding tree             | Did authors provide a description of the coding tree?                                                   | Methods            |
| 26. Derivation of themes                       | Were themes identified in advance or derived from the data?                                             | Methods            |
| 27. Software                                   | What software, if applicable, was used to manage the data?                                              | Methods            |
| 28. Participant checking                       | Did participants provide feedback on the findings?                                                      | Discussion         |
| <i>Reporting</i>                               |                                                                                                         |                    |
| 29. Quotations presented                       | Were participant quotations presented to illustrate the themes/findings? Was each quotation identified? | Results            |
| 30. Data and findings consistent               | Was there consistency between the data presented and the findings?                                      | Discussion         |
| 31. Clarity of major themes                    | Were major themes clearly presented in the findings?                                                    | Results            |
| 32. Clarity of minor themes                    | Is there a description of diverse cases or discussion of minor themes?                                  | Discussion         |
